# Supplementary material
Source: PubMed Central journal article supplement (PMC6129419)

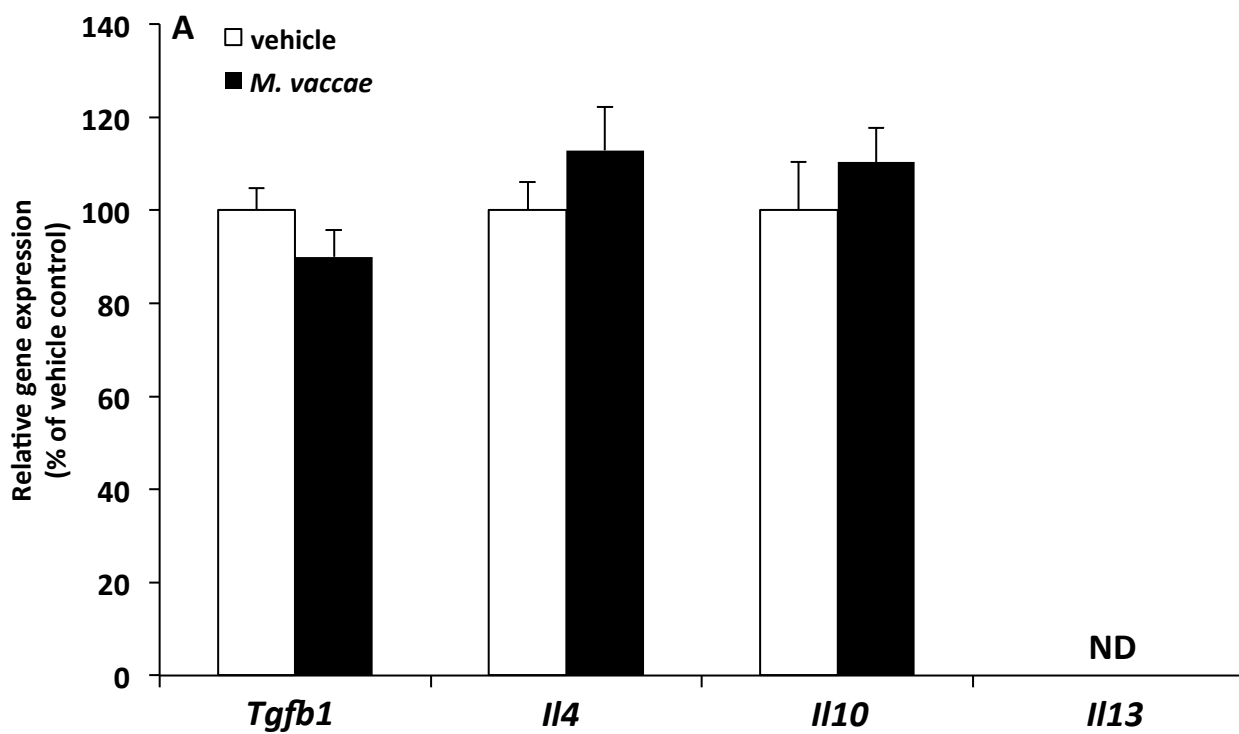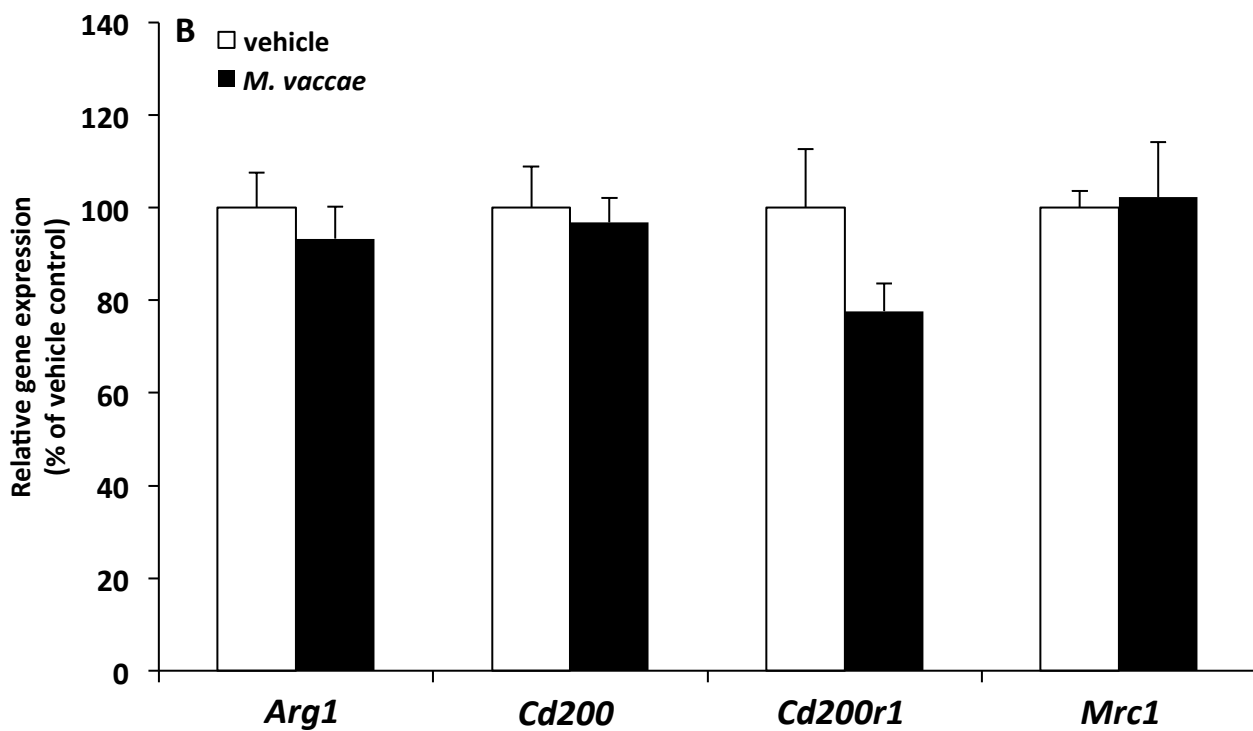

Supplement: NIHMS971201-supplement-1.pdf [file NIHMS971201-supplement-1.pdf]

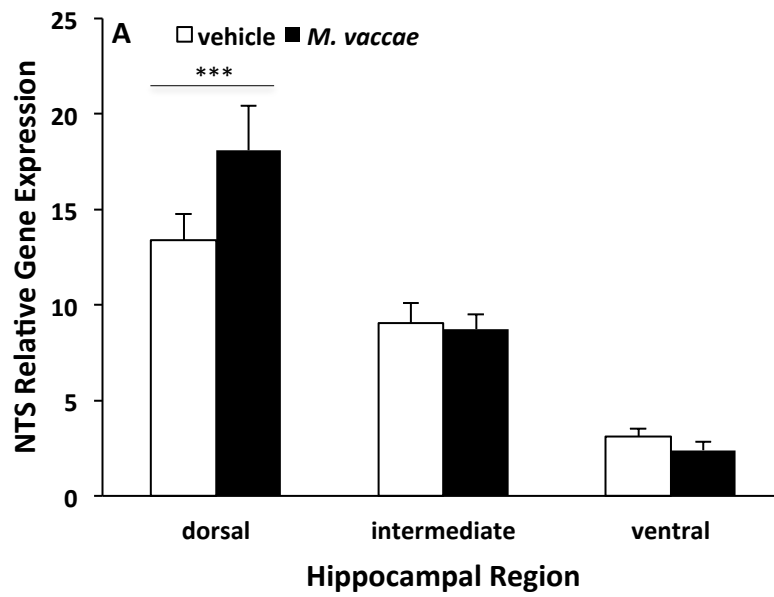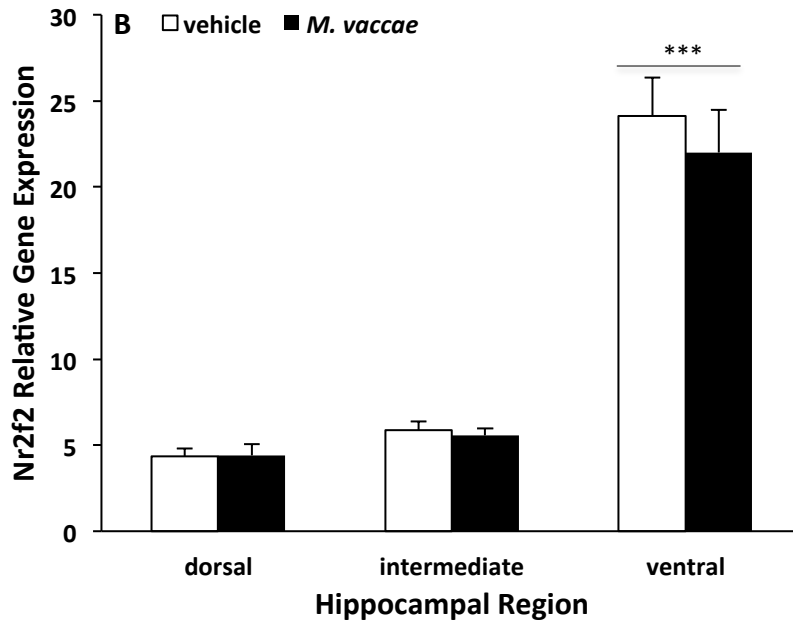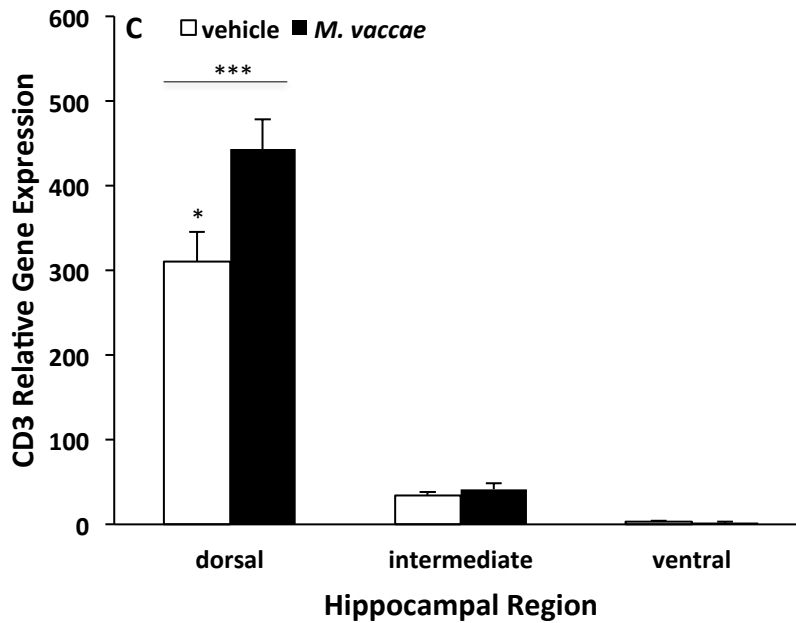

Supplement: NIHMS971201-supplement-2.pdf [file NIHMS971201-supplement-2.pdf]
